# Supplementary material for: Four Common Pesticides, Their Mixtures and a Formulation Solvent in the Hive Environment Have High Oral Toxicity to Honey Bee Larvae
Source: PLoS One. 2014 Jan 8;9(1):e77547. doi: 10.1371/journal.pone.0077547 (PMC3885384; doi:10.1371/journal.pone.0077547)
Supplement: Table S1 — Some pesticide formulations that disclose in msds the percentage of the solvent NMP. (DOCX) [file pone.0077547.s001.docx]

**Table S1.** Some pesticide formulations that disclose in msds the percentage of the solvent NMP.

| **Formulation#** | **Registrant** | **Active Ingredient(s)** | **% NMP**† |
| --- | --- | --- | --- |
| Abamectin E-AG® 0.15EC | Etigra | abamectin | ≤ 30 |
| Acatak® Pour-On Tick Inhibitor | Novartis | fluazuron | 30-60 |
| Advantix® for Dogs | Bayer | imidacloprid, permethrin | 30-60 |
| Agri-Mek® or Ardent® 0.15EC | Syngenta | abamectin | ≤ 30 |
| Alto® 100 SL Fungicide | Syngenta | cyproconazole | ≤ 10 |
| Assert® Herbicide | Nufarm | imazamethabenz methyl ester | 49 |
| Assure® II Herbicide | DuPont | quizalofop-p-ethyl | < 8 |
| Baycor® 300, Turf Fungicide | Bayer | bitertanol | 54 |
| Bayfidan® 250 EC Fungicide | Bayer | triadimenol | 60 |
| Campaign® Herbicide | Monsanto | isopropylamine salts of glyphosate, 2,4-D | ≤ 7 |
| CFT Legumine™ Piscicide | CWE Properties | rotenone | 10 |
| Confidor® SL 200 | Bayer | imidacloprid | 38 |
| Confidor® Supra | Bayer | imidacloprid, cyfluthrin | 87 |
| Crown® 225SL | Scotts | acetamiprid | 30 |
| Diamond® 0.83EC | Makhteshim Agan | novaluron | 40-50 |
| Goal® 2XL EC Herbicide | Dow | oxyflurofen | 10 |
| Jaguar® Selective Herbicide | Bayer | bromoxynil octanoate diflufenican | 15 |
| Ortho® Systemic Insect Killer | Ortho | acephate | < 25 |
| Quizalofop 200 EC Herbicide | 4Farmers | quizalofop-p-ethyl | 15 |
| Ricestar® Herbicide | Bayer | fenoxaprop-p-ethyl, isoxadifen-ethyl | 15 |
| Saprol® Fungicide | BASF | triforine | 24 |
| Score® Foliar Fungicide | Syngenta | difenoconazole | 10-30 |
| Sphere® Fungicide | Bayer | cyproconazole, trifloxystrobin | 55 |
| Temprano® | Chemtura | abamectin | 15-40 |
| Tilt Xtra® Fungicide | Syngenta | cyproconazole, propiconazole | < 20 |
| Zoro® | Cheminova | abamectin | 15-40 |

**#**Insecticide or miticide unless noted otherwise.

**†**N-methyl-2-pyrrolidone; application rate of pesticides range from 0.05 to 100% of formulation diluted in water with an 1% average per product, and rates increasing from insecticide > fungicide > herbicide.
